# Supplementary material for: A highly-effective nitrogen-doped porous carbon sponge electrode for advanced K–Se batteries
Source: Royal Society of Chemistry journal article supplement (doi:10.1039/c9qi01506j), 2020-01-01
Supplement: c9qi01506j1.pdf [file c9qi01506j1.pdf]

## Supporting Information

### Highly-effective nitrogen-doped porous carbon sponge electrode for advanced K-Se batteries

Xianglong Huang<sup>a,c</sup>, Jianhua Deng<sup>a,c</sup>, Yuruo Qi<sup>a,b</sup>, Dingyu Liu<sup>a,b</sup>, Yuanke Wu<sup>a,b</sup>, Wei Gao<sup>a,b</sup>, Wei Zhong<sup>a,b</sup>, Fang Zhang<sup>a</sup>, Shujuan Bao<sup>a,b,\*</sup> and Maowen Xu<sup>a,b,\*</sup>

<sup>a</sup> School of Materials and Energy, Southwest University, Chongqing 400715, P. R. China.

<sup>b</sup> Chongqing Key Laboratory for Advanced Materials and Technologies of Clean Energies, Chongqing 400715, P.R. China.

<sup>c</sup> These authors have equal contributions to this work.

\*Corresponding author. Tel/Fax: +86-023-68254732; E-mail: baoshj@swu.edu.cn; xumaowen@swu.edu.cn

## Supporting Information

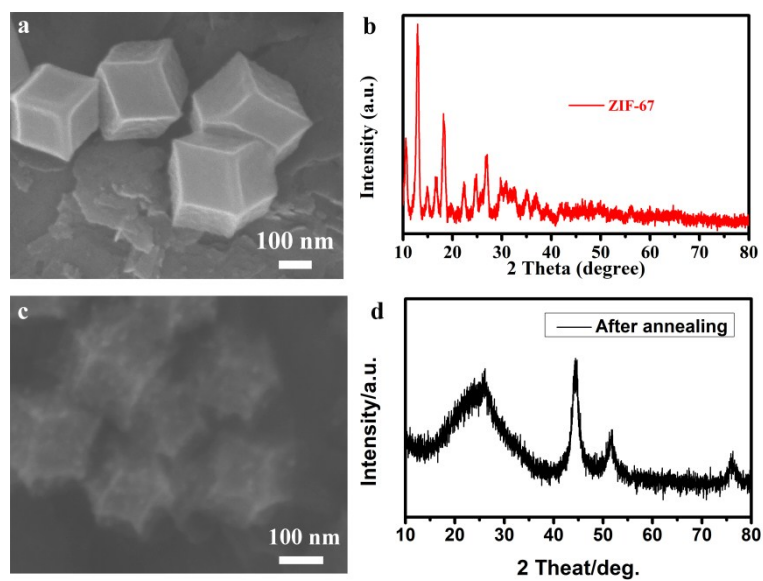

Figure S1. (a) and (c) FESEM image of ZIF-67 before and after the annealing; (b) and (d) XRD patterns of ZIF-67 before and after the annealing.

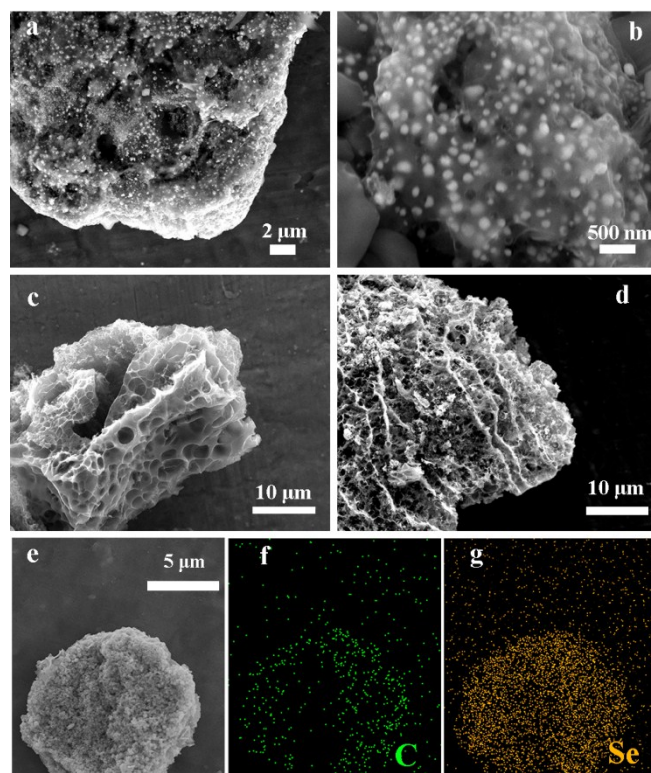

Figure S2. (a-b) FESEM images of the precursor; (c) FESEM image of NPCS; (d-e) FESEM image of the Se@NPCS composite; (f-g) The element mappings.

## Supporting Information

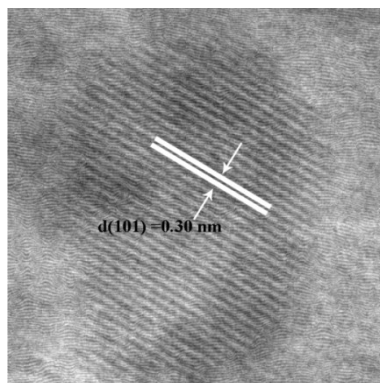

Figure S3. HRREM image of the Se@NPCS composite.

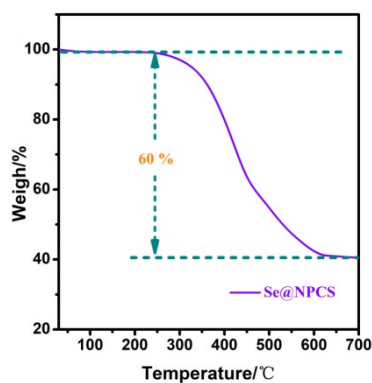

Figure S4. TGA curve of the Se@NPCS composite at N<sub>2</sub> atmosphere.

| Material | Specific surface area              | Pore volume                            | Pore diameter contribution |
|----------|------------------------------------|----------------------------------------|----------------------------|
| NPCS     | 737 m <sup>2</sup> g <sup>-1</sup> | 0.8733 cm <sup>3</sup> g <sup>-1</sup> | 2-8 nm                     |
| Se@NPCS  | 12 m <sup>2</sup> g <sup>-1</sup>  | 0.1023 cm <sup>3</sup> g <sup>-1</sup> | 4 nm                       |

Table S1. Porosity comparison of NPCS and the Se@NPCS composite.

## Supporting Information

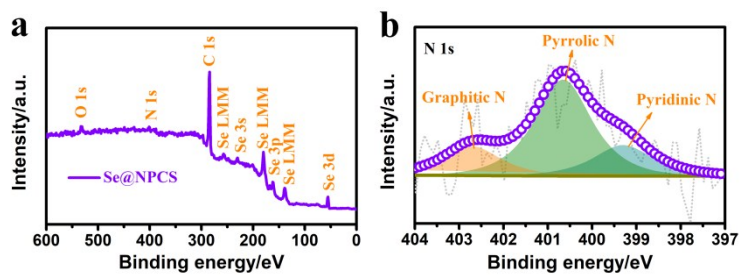

Figure S5. (a) XPS spectra of the Se@NPCS composite; (b) XPS spectra of N 1s.

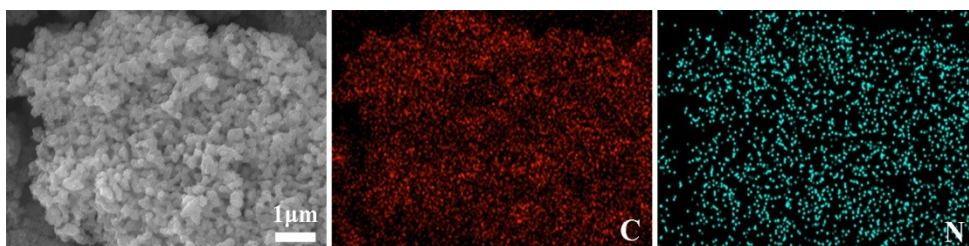

Figure S6. Nitrogen elemental mapping of the carbonized ZIF-67.

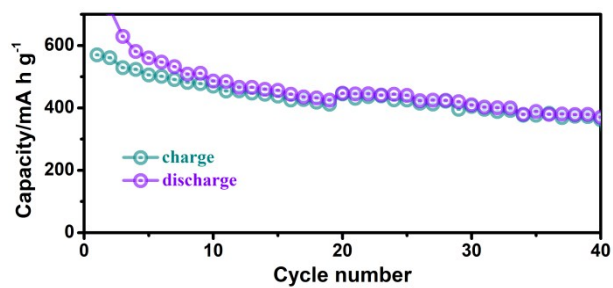

Figure S7. Cycling performance of the Se@NPCS composite at 0.1 C.

## Supporting Information

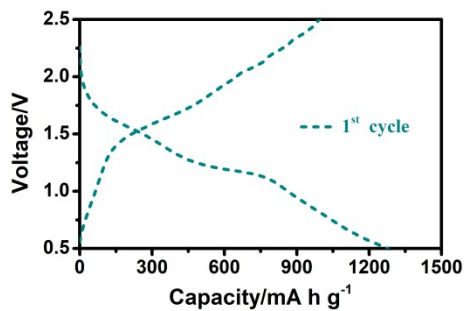

Figure S8. Discharge-charge profiles of the first cycle at 0.5 C.

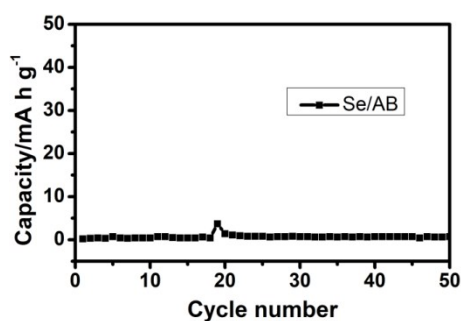

Figure S9. Cycling performance of the Se/AB mixture at 0.5 C.

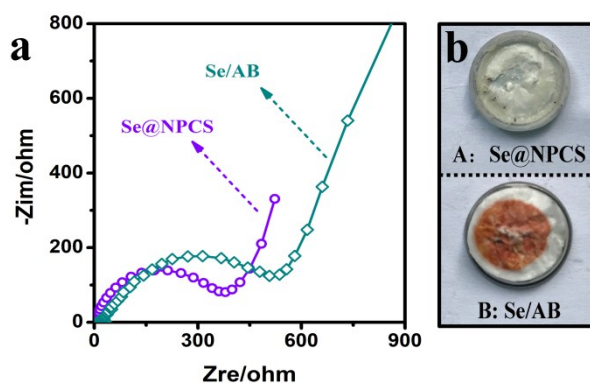

Figure S10. (a) Nyquist plots of the batteries with the fresh Se/AB electrode and Se@NPCS electrode before cycling; (b) Glass fibers of the half-cells with the Se/AB and Se@NPCS electrode after cycling.
